# Supplementary material for: High throughput spectrally resolved super-resolution fluorescence microscopy with improved photon usage
Source: Royal Society of Chemistry journal article supplement (doi:10.1039/d4an00343h), 2024-01-01
Supplement: d4an00343h1.pdf [file d4an00343h1.pdf]

**High Throughput Spectrally Resolved Super-Resolution Fluorescence Microscopy  
with Improved Photon Usage**

James Ethan Batey, Geun Wan Kim, Meek Yang, Darby Claire Heffer, Elric Dion Pott, Hannah  
Giang, and Bin Dong\*

Department of Chemistry and Biochemistry, University of Arkansas, Fayetteville, Arkansas 72701,  
United States.

\*Corresponding author. Email: [bind@uark.edu](mailto:bind@uark.edu).

**Table of Contents**

|                                        |    |
|----------------------------------------|----|
| <b>S1. Materials and methods</b> ..... | 2  |
| <b>S2. Supporting figures</b> .....    | 7  |
| <b>S3. Supporting references</b> ..... | 13 |

## **S1. Materials and methods**

**Cell culture.** A549 human lung cancer cell line (CCL-185, ATCC) was acquired from the American Type Culture Collection. The A549 cells were cultured in T25 cell culture flask (690160, Greiner Bio-One) in the cell culture medium Dulbecco's Modified Eagle's Medium (DMEM) (10-014-CV, Corning) with 10% fetal bovine serum (FBS) (26140079, Gibco) and 1% Penicillin-Streptomycin (Pen Strep) (15140122, Gibco).  $\mu$ -slide 8 Well high Glass Bottom chambered coverslip (80807, ibidi) was obtained a gift from ibidi. The chambers were rinsed with PBS before use to remove glass dust. To subculture cells, to each chamber, 50  $\mu$ L cell suspension solution was added. Then, 250  $\mu$ L of DMEM containing 10% FBS and 1% Pen Strep was added to every chamber. The chambered coverslip was kept in the cell culture incubator at 37°C with 5% CO<sub>2</sub> for 24 hours before the cells were used in imaging experiments.

### **Immunostaining of subcellular structures.**

#### *Materials:*

Cells grown in 8 well-plate.

Pre-warmed Phosphate-buffered saline (BPS)

Pre-warm Fixing Solution (3% v/v Paraformaldehyde (PFA), 0.1% v/v glutaraldehyde (GA), PBS)

Reducing solution (10 mg NaBH<sub>4</sub> in 10 mL DI water)

Blocking Buffer (3% w/v Bovine serum albumin (BSA), 0.2% v/v Triton-X100, PBS)

Washing Buffer (0.2% w/v BSA, 0.05% v/v Triton-X100, PBS)

Primary antibody

Dye-conjugated secondary antibody

Storing solution (0.1% v/v Sodium azide, PBS)

#### *Procedure:*

The Cell culture medium was aspirated from the well-plate chamber and the chamber was washed using 200 $\mu$ L of the warmed PBS. 200  $\mu$ L of the warmed fixing solution was added to each well-plate chamber. The well plate was left undisturbed for 10 minutes. The fixing solution was aspirated and 200  $\mu$ L of the reducing solution was added to each chamber. The well-plate was then shaken for 7 minutes using an orbital shaker. For the following steps, the well-plate was shaken for the stated time using an orbital shaker unless stated otherwise. The reducing solution was aspirated and 200  $\mu$ L of PBS was used to wash the chambers of the well-plate. The washing step

was performed 3 times with each washing cycle lasting 7 minutes. The PBS was aspirated and 200  $\mu\text{L}$  of the blocking buffer was added to each chamber of the well-plate. The cells were blocked for 60 minutes. The blocking buffer was aspirated and 150  $\mu\text{L}$  of the primary antibody were added to each chamber of the well-plate. The primary antibody was allowed to incubate for 60 minutes. The primary antibody was aspirated and 200  $\mu\text{L}$  of the washing buffer were added to the chambers of the well-plate. The washing step was performed 3 times with each washing cycle lasting 15 minutes. For the following steps, the well-plate was shielded from light by covering it with aluminium foil. The washing buffer was aspirated and 150  $\mu\text{L}$  of the labelled secondary antibody were added to each chamber of the well-plate. The secondary antibody was allowed to incubate for 45 minutes. The secondary antibody was aspirated and 200  $\mu\text{L}$  of the washing buffer was added to each chamber of the well-plate. The washing step was performed 3 times with each washing cycle lasting 10 minutes. The washing buffer was aspirated and 500  $\mu\text{L}$  of PBS was added to the chambers. This washing step was performed once for 5 minutes. The PBS was aspirated and 200  $\mu\text{L}$  of the fixing solution was added to each well-plate chamber. The well plate was left undisturbed for 10 minutes. The fixing solution was aspirated and 500  $\mu\text{L}$  of PBS was added to each chamber of the well-plate. The washing step was performed 3 times with each washing cycle lasting 10 minutes. The PBS was aspirated and 500  $\mu\text{L}$  of the storage solution was added to each well-plate chamber. The well plate was covered with aluminium foil, and it was stored at 4 °C before the imaging experiments.

### **Microscope setup.**

The imaging experiments were carried out using a total internal reflection fluorescence microscopy (TIRFM). An adjustable 100-mW 642-nm CW laser (Oxxius, Lannion, France) was focused at the back focal plane of an oil immersion objective (Olympus, UPLAPO100X, NA 1.50) and project a collimated illumination beam into the sample. By shifting the laser beam laterally before entering the objective, the laser beam projects to the sample/cover slip interface at an angle larger than the critical angle. The laser beam was totally reflected, and an evanescent field of the same wavelength was created at the interface. The intensity in the evanescent field decays exponentially as the distance increases from the interface, which effectively excites fluorophores near the interface and increases signal to noise for imaging. A field stop was used to control the illumination area. The fluorescence signal was collected by the same oil immersion objective. A quadra-band filter set

(Chroma, TRF89901v2) was used to direct laser for excitation and reject laser background for fluorescence emission. An additional 706/95 bandpass filter (Chroma) was used to further reduce laser scattering background. The collected fluorescence signal was directed into a custom-built dual channel imaging box. The imaging box consists of a 50:50 nonpolarizing beam splitter (Thorlabs), which creates the two channels. In one channel, the fluorescence emission was further modified by a colour glass filter (Thorlabs). The modified and nonmodified (i.e., reference) signals were focused on different portions of a highly sensitive EMCCD camera (Andor iXonEM<sup>+</sup> Ultra 897 camera) for dual channel imaging. For optical grating-based SR-SMLM, the beam splitter was removed from the imaging box and a transmitted optical grating (GT25-06V, Thorlabs) was inserted into the detection optical path. The zero- and first-order images of diffraction of the collected signal were captured on different parts of the camera simultaneously.

### **dSTORM imaging.**

#### *Materials:*

GLOX solution (1 mg glucose oxidase, 15.3  $\mu$ L PBS, 4.7 $\mu$ L of 17 mg/mL catalase)

1M beta-Mercaptoethylamine (MEA)

Imaging Buffer (50mM Tris buffer, 10mM NaCl, 10 % glucose (m/v))

STORM buffer using beta-mercaptoethanol ( $\beta$ ME) (1% GLOX (v/v) 1%  $\beta$ ME (v/v) in imaging buffer)

STORM buffer using MEA (1% GLOX (v/v) 1% MEA (v/v) in imaging buffer)

#### *Procedure:*

The storm buffer using  $\beta$ ME/MEA was added into the chamber using a micropipette. To exchange the imaging buffers, the original buffer was washed away using PBS buffer. The new imaging buffer was then added into the chamber. Conventional fluorescence image was first taken at low laser power density. Then the laser power was increased to photoswitch the majority of the dye molecules into nonfluorescent dark state. A random subset and spatially resolved dye molecules were kept in fluorescing (on state) in each imaging frame. For each dSTORM imaging experiment, data of 30k-40k frames were collected at an imaging rate of 50 frames per second (fps). The imaging rate can be further improved by either using a camera link for data transfer from Andor camera to the imaging software or selecting smaller regions of interest.

## Data analysis.

The collected single molecule imaging data were analyzed by either ThunderSTORM ImageJ plugin<sup>1</sup> or Insight3. The single molecules in both channels were first identified and localized independently. To identify the same single molecule in both channels, a correlation analysis procedure was followed which is shown in Figure S2. We first imaged fluorescent beads on coverslip and use their localized positions to build a transformation matrix. The transformation matrix can then be used to project the spatial coordinates of localized single molecule positions from CGF-modified channel to the reference channel. The projected molecular positions are then compared to those obtained in the reference channel. Molecular positions that are within the same imaging frame and within the localization precision are considered as from the same molecule. Their photon intensities were used for calculating the  $I_1/I_0$  ratio. Applying the calibration curve, we obtained the spectral mean ( $\lambda_{\text{mean}}$ ). The average localized position of the same molecule in both channels was calculated. Combining the obtained spectral mean and average localized position, spectrally resolved super-resolution image was rendered using Insight3 software. The correlation analysis was done using MATLAB.

To determine the localization precisions, we used the cluster analysis method. Nonspecific bind dye labelled antibodies appear as smaller clusters in dSTORM images. More than 30 smaller clusters were obtained and aligned by their centre mass for the cluster analysis (Figure S4). Each individual small cluster has more than 10 locations. Cross-sectional histogram distributions in both x and y dimensions of molecular positions from these small clusters were then calculated. Fitting these histogram distributions with 1D Gaussian function gives the uncertainties of locations, which represents the localization precisions in the dSTORM images.

To determine the spectra of a single emitters using the grating method, the imaging system was first calibrated using narrow-band pass filters (Thorlabs). Briefly, the optical slit in front of lens  $L_1$  was set at a position conjugated to the imaging plane and closed to form a line profile as shown in Figure S5a. In our imaging setup, we use the zero-order and first-order image of diffraction. The zero-order image appears at the same location, but the lateral position of first-order image changes under different wavelengths (Figure S5a-b). The number of lateral shifted pixels in the first-order image relative to the zero-order image was measured and used to build a calibration curve versus the wavelengths (Figure S5c). When imaging single emitters, the zero-order image appears as

spherical dot where no colour splitting is present (Figure S6a, left column). The first-order images show up as lateral stretched line profiles where wavelength increases from left to right (Figure S6a, right column). To extract the spectra from these images, the position of the zero-order diffracted images was localized, and their positions were then projected to the spectral image at 650 nm using the pre-established calibration curve (Figure S5c). The corresponding portion of the spectral image covering wavelength range from 650 to 750 nm was extracted. The cross-profile intensity along the diffraction direction was measured and plotted versus wavelength (Figure S6b) to obtain the spectra. The data analysis was done using ThunderSTORM ImageJ plugin<sup>1</sup> and MATLAB.

## S2. Supporting figures

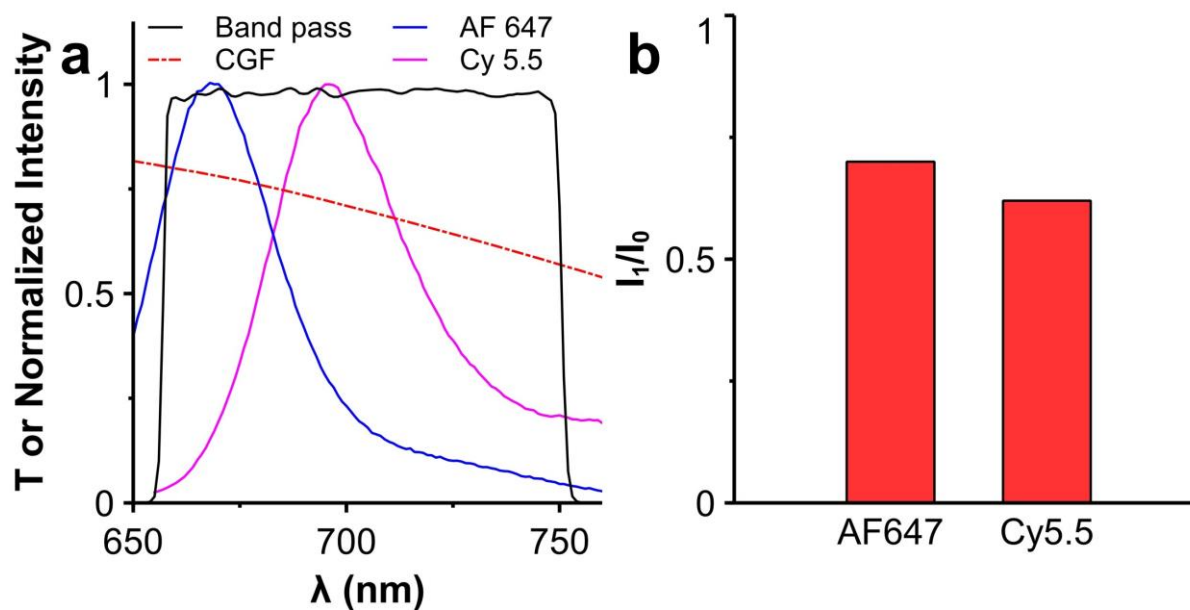

**Figure S1. Filter set in the dual channel optical imaging system.** (a) Transmission of 706/95 band pass, colour glass filter, and fluorescence emission profiles of AF647 and Cy5.5. Note that the glass filter only presents in one of the channels. (b) Theoretical intensity ratios in two channels for AF647 and Cy5.5.

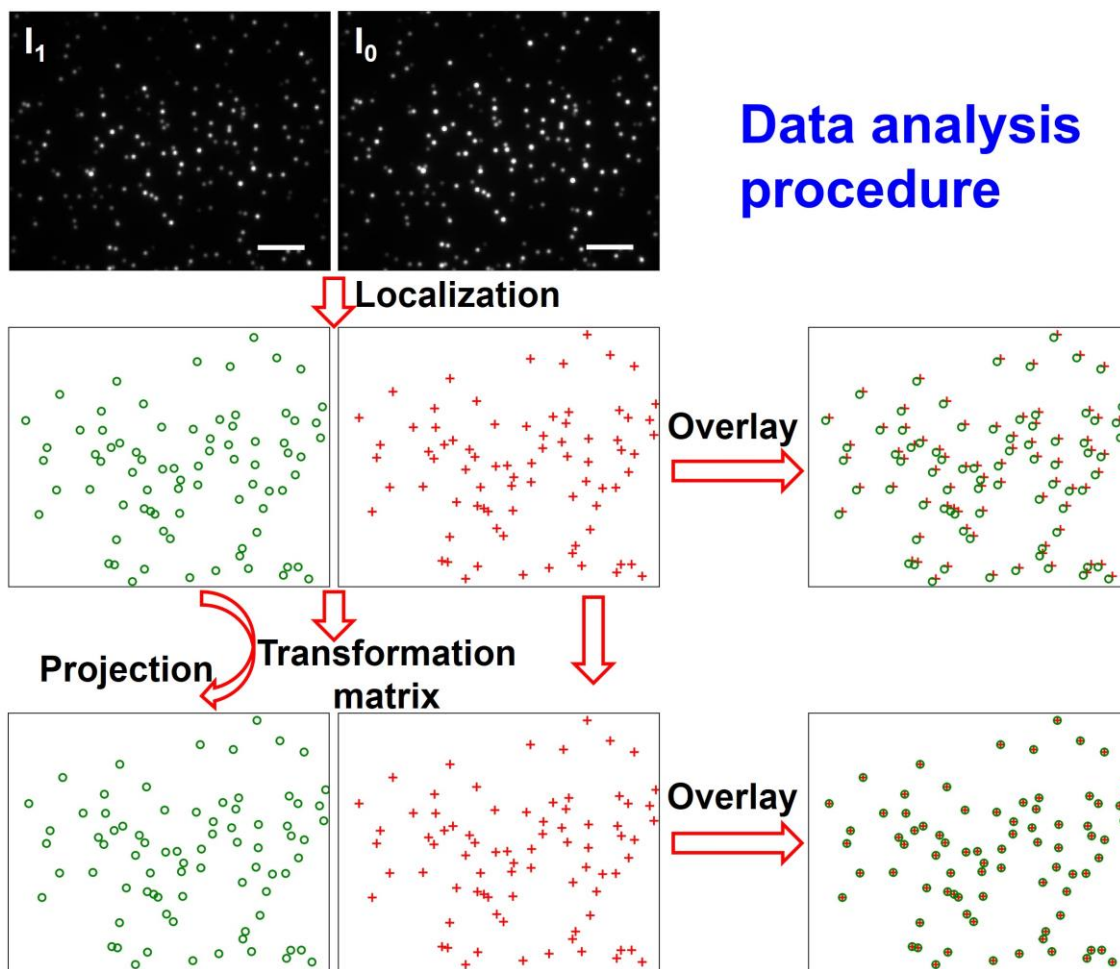

**Figure S2. Schematic view of data processing for identify the same molecule in two channels.** The transformation matrix for the dual channel imaging was calibrated using fluorescent beads first and then applied for correlation analysis of single molecule data.



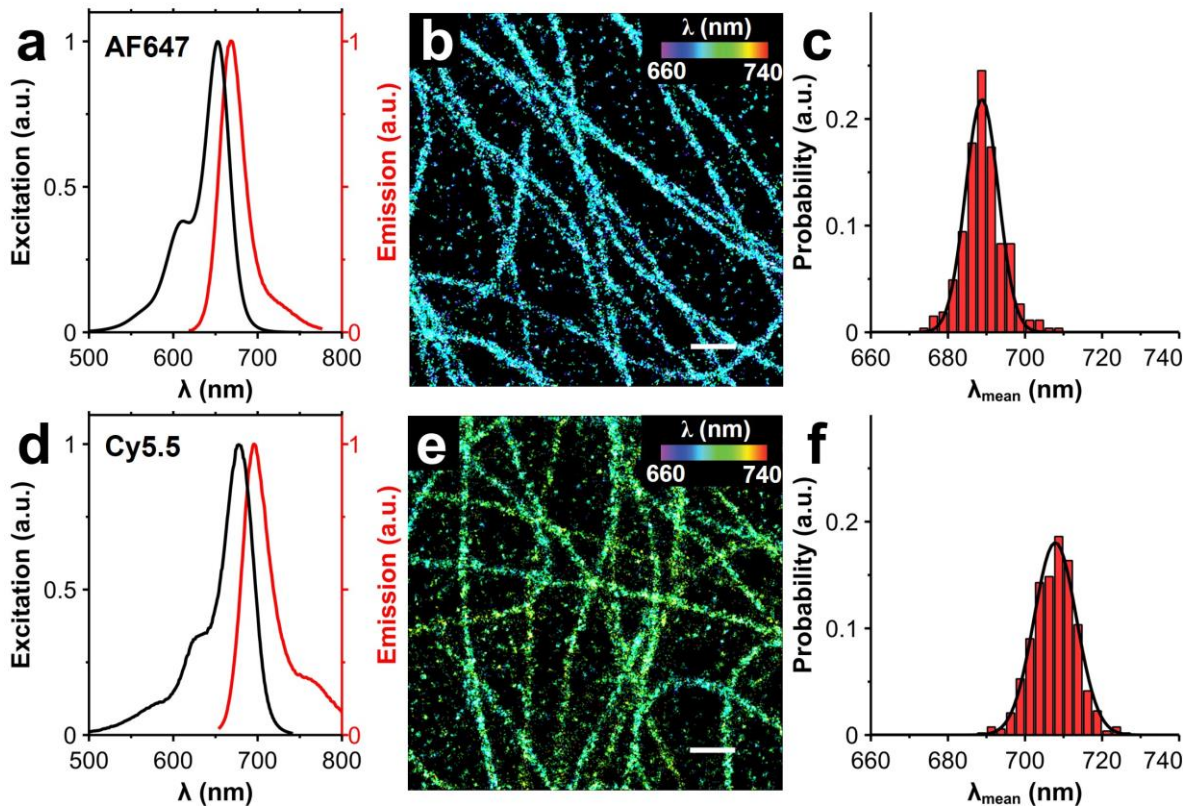

**Figure S3. Spectrally resolved single molecule localization microscopy imaging of microtubules in A549 cell.** (a, d) Excitation and emission spectra of AF647 and Cy5.5. (b, e) Spectrally resolved super-resolution fluorescence image of microtubules labelled with AF647 and Cy5.5. (c, f) The histogram distribution spectral mean for AF647 and Cy5.5. The histogram distribution of spectral mean was fitted by 1D Gaussian function, giving a mean emission wavelength of  $689.2 \pm 5.3$  and  $707.9 \pm 5.5$  nm for AF647 and Cy5.5 respectively. Scale bar: 500 nm.

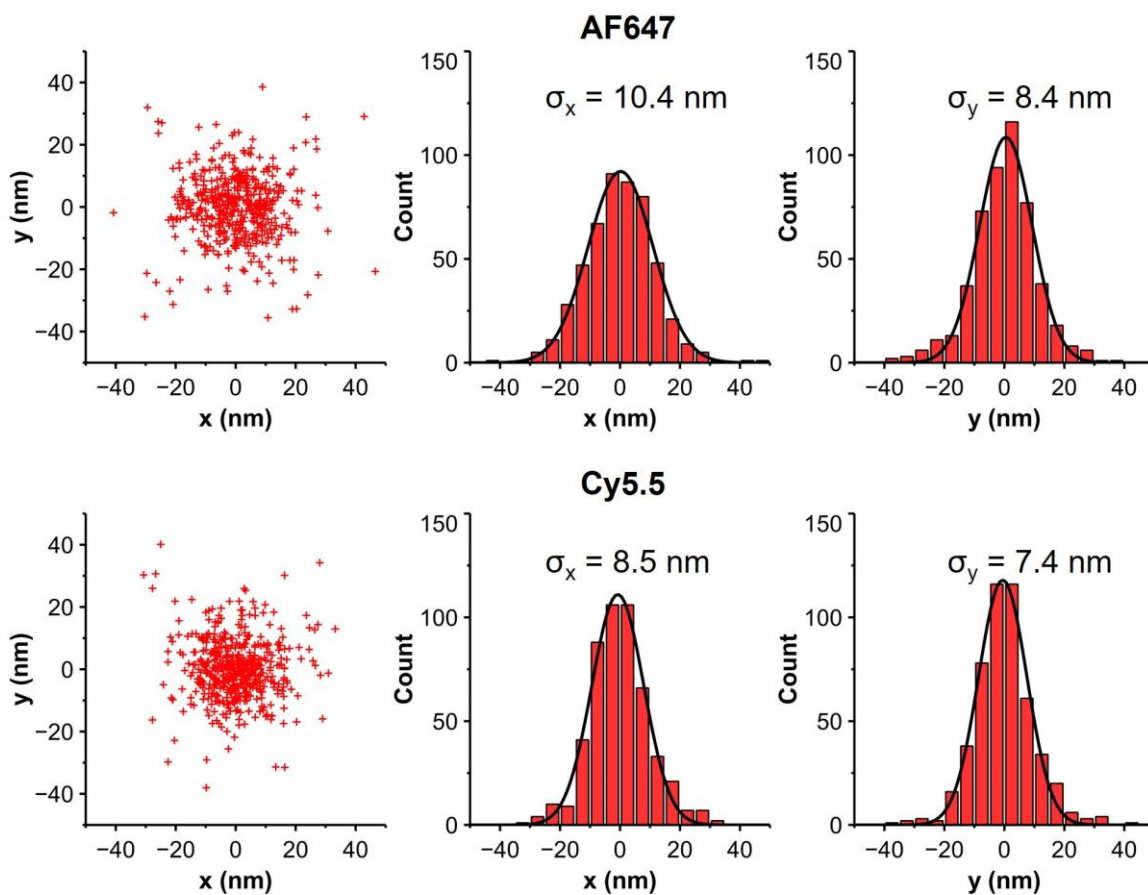

**Figure S4. Localization precisions.** Cluster analysis for quantification of localization precisions using AF647 and Cy5.5.

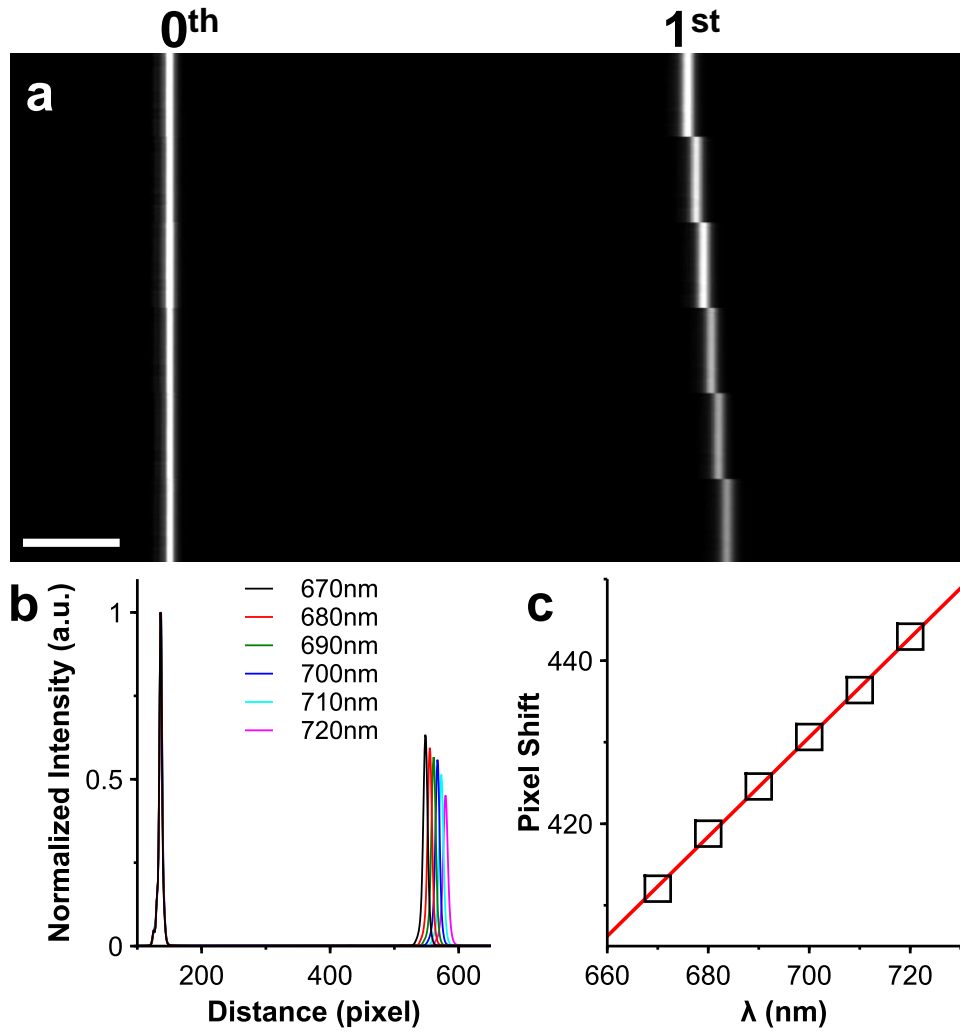

**Figure S5. System calibration for optical grating-based SR-SMLM using narrow band filters.** (a) zero- and first-order image of the optical slit. (b) Cross-sectional intensity profiles under different wavelength. (c) Calibration curve of the number of lateral pixel shift over wavelength in first-order image relative to the zero-order image. Scale bar: 10  $\mu\text{m}$ .

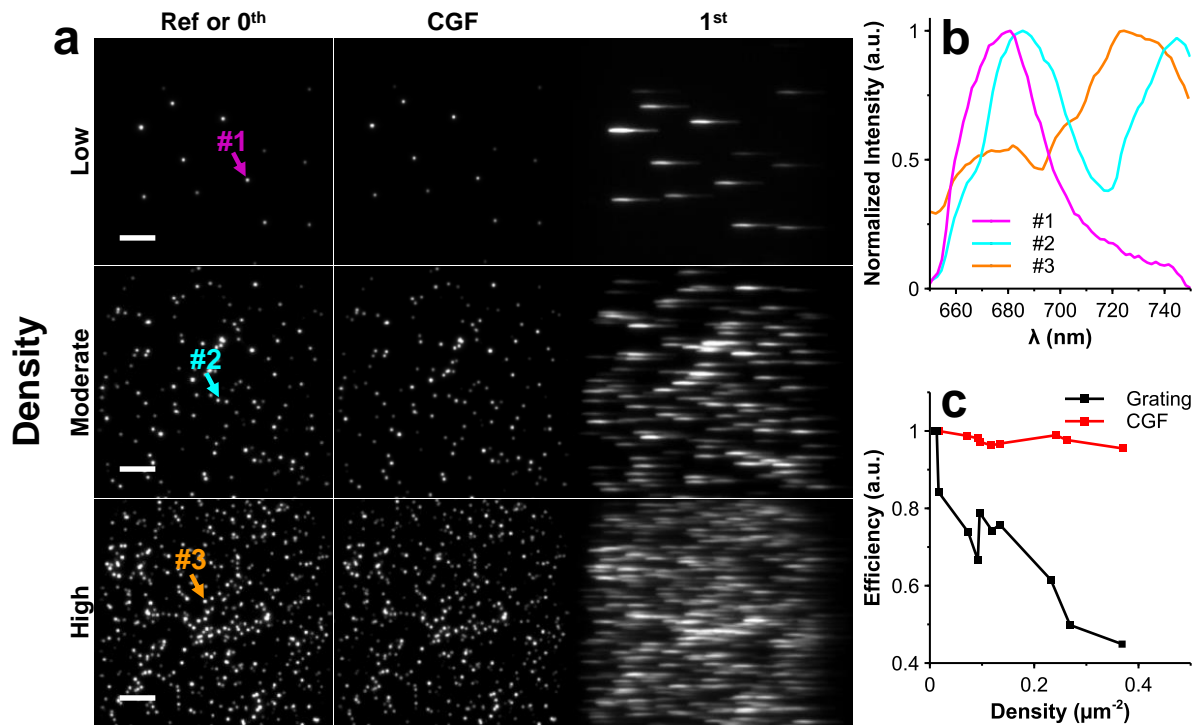

**Figure S6. Throughput comparison between CGF- and optical grating-based SR-SMLM.**

(a) Representative fluorescence images for reference or 0<sup>th</sup> order (left column), CGF (middle column), and 1<sup>st</sup> order (right column) of fluorescent beads are shown at different emitter density. (b) Examples of fluorescence emission spectra from single fluorescent beads under different emitter density. Significant spectral interference was observed under high emitter density (#2-3). (c) The efficiency of obtaining spectra from single emitter was compared between two approaches. Under high emitter density, the throughput of single emitter measurement decreases more significantly for optical grating-based SR-SMLM. Scale bar: 5  $\mu\text{m}$ .

### **S3. Supporting references**

1. M. Ovesný, P. Křížek, J. Borkovec, Z. Švindrych and G. M. Hagen, *Bioinformatics*, 2014, **30**, 2389-2390.
